# Supplementary material for: Metabolic profiling of an alcoholic fatty liver in zebrafish ( Danio rerio )
Source: Royal Society of Chemistry journal article supplement (doi:10.1039/c2mb25073j), 2012-04-25
Supplement: c2mb25073j.pdf [file c2mb25073j.pdf]

## Supporting Information

### Metabolic profiling of alcoholic fatty liver in zebrafish (*Danio rerio*)

Zi-Hey Jang<sup>a,b</sup>, Hee-Chung Chung<sup>b,c</sup>, Yun Gyong Ahn<sup>a</sup>, Yong-Kook Kwon<sup>a,b</sup>, Jin-Sup Kim<sup>a,b</sup>,  
Jaeho Ryu<sup>b,c</sup>, Do Hyun Ryu<sup>d</sup>, Cheol-Hee Kim<sup>\*b,c</sup> and Geum-Sook Hwang<sup>\*a,b</sup>

<sup>a</sup>*Seoul Centre, Korea Basic Science Institute, Seoul 136-713, Republic of Korea,*

<sup>b</sup>*Graduate School of Analytical Science and Technology, Chungnam National University,  
Daejeon 305-764, Republic of Korea*

<sup>c</sup>*Department of Biology, Chungnam National University, Daejeon 305-764, Republic Korea*

<sup>d</sup>*Department of Chemistry, Sungkyunkwan University, Suwon 440-746, Republic of Korea*

Correspondence to Geum-Sook Hwang, Korea Basic Science Institute, Seoul, Republic of Korea, E-mail: [gshwang@kbsi.re.kr](mailto:gshwang@kbsi.re.kr); Fax: +82-2-920-0778; Tel: +82-2-920-4137; Cheol-Hee Kim, Chungnam National University, Daejeon, Republic of Korea, E-mail: [zebrakim@cnu.ac.kr](mailto:zebrakim@cnu.ac.kr); Fax: +82-42-822-9690; Tel: +82-42-821-7535;

Table S1. PCA and PLS-DA modeling results comparing alcoholic fatty liver group and control group.

|                                 | models | PCA or PLS-DA components | $R_x^2$ | $R_Y^2$ | $Q^2$ |
|---------------------------------|--------|--------------------------|---------|---------|-------|
| Aqueous fraction using NMR      | PCA    | 2                        | 0.83    |         | 0.73  |
|                                 | PLS-DA | 2                        | 0.71    | 0.99    | 0.90  |
| Lipophilic fraction using NMR   | PCA    | 2                        | 0.92    |         | 0.73  |
|                                 | PLS-DA | 2                        | 0.77    | 0.89    | 0.50  |
| Lipophilic fraction using GC/MS | PCA    | 2                        | 0.63    |         | 0.25  |
|                                 | PLS-DA | 2                        | 0.59    | 0.97    | 0.98  |

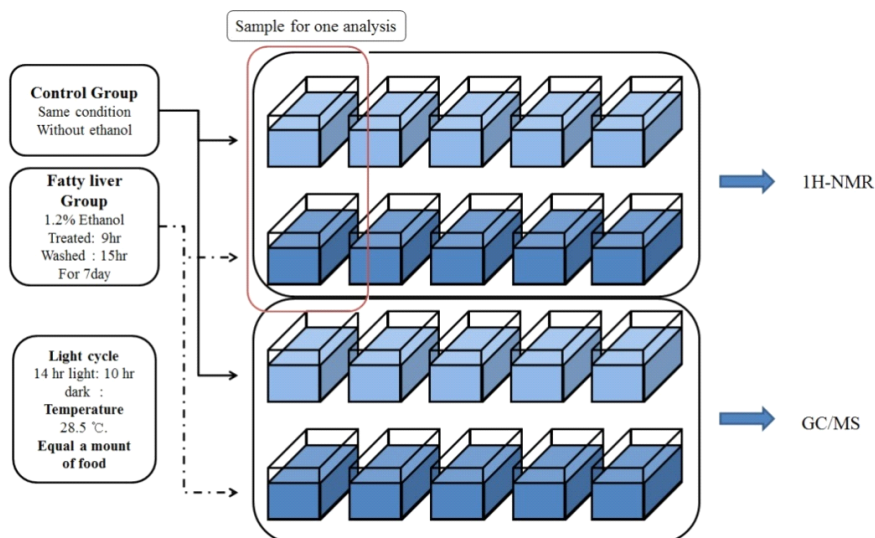

Figure S1. Experiment design for NMR and GC analysis. Each aquarium represents a group of 20 fishes from which the liver were taken. Liver were pooled to equal weights before the extraction of metabolites to account for variation in size of liver samples.

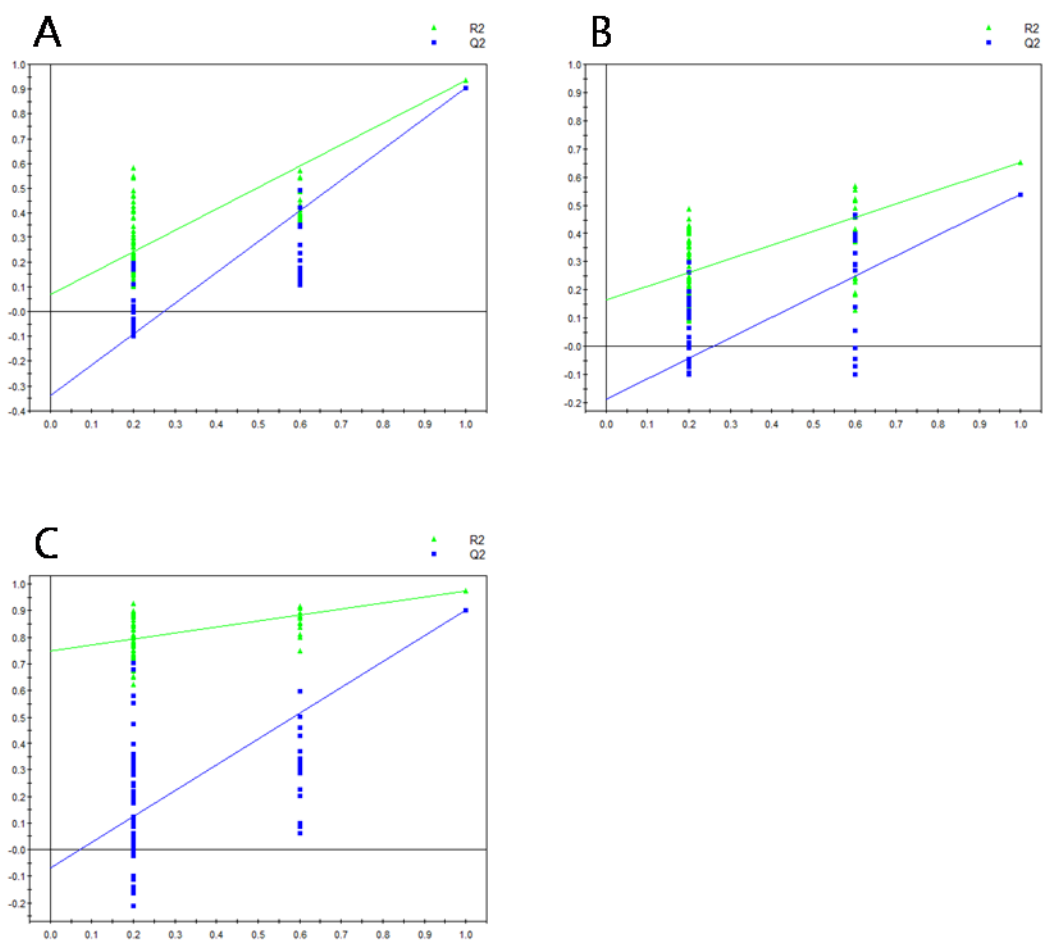

Figure S2. The permutation tests were carried out with 100 random permutations in PLS-DA models. A, aqueous fraction ( $Q^2_{\text{inter}} : -0.337$ ); B, lipid fraction ( $Q^2_{\text{inter}} : -0.186$ ) obtained from <sup>1</sup>H NMR spectra; C, nonpolar compounds ( $Q^2_{\text{inter}} : -0.066$ ) obtained from GC/MS spectra.
